# Supplementary material for: Testosterone and estradiol predict male calling performance, but not performance-related tradeoffs, in competitive signaling environments in Cope’s gray treefrogs (Hyla chrysoscelis)
Source: Research Square preprint supplement (doi:10.21203/rs.3.rs-8695050/v1), 2026-02-04
Supplement: Supplementary file 5 [file ed9bb946d5b75705954d7159.xlsx]

## Sheet: data
subj_id	trial	air_temp	water_temp	spl	dist_bw	svl	tfl	weight	rec_start	time_bleed	bleed_time	testo (pg/mL)	log10_testo	cort (pg/mL)	log10_cort	estradiol (pg/mL)	log10_estradiol	numcalls	period	period_cv	duration	pulsen	fundfreq	domfreq	rel_db	total_calling	call_rate	pulse_min
1L	a	16		75.2	465	32.65	15.52	3.29	44	60	1	1126.21	3.05162	698.689	2.84428	185.081	2.26736	90	6.35763	0.232411	0.562522	28.3	1418.61	2378.56	9.06467	50.627	9.94529	281.191
1R	a	16		75.2	465	33.52	14.93	3.17	44	56	1	3002.72	3.47752	884.955	2.94692	236.31	2.37348	159	3.89739	0.300299	0.476597	23.3333	1364.48	2495.43	12.7099	75.779	16.6365	389.068
2L	b	16		68	284				77									33	6.95093	0.189315	0.544	25.091	1277.02	2457.61	2.257	17.957	8.96414	225.037
2R	b	16		68	284	29.08	14.13	2.92	77	88	2	57938.2	4.76296	620.382	2.79266	255.687	2.40771	74	6.78062	0.204425	0.637351	30.4865	1353.01	2392.53	11.4493	47.164	9.23051	281.296
3L	c	20	22.4	74.8	498	32.94	14.92	3.07	5	19	3	10379.1	4.01616	1752.87	3.24375	268.081	2.42827	118	4.9946	0.256581	0.539093	30.1186	1415.35	2495.81	10.0968	63.613	12.7948	385.161
3R	c	20	22.4	74.8	498	35.28	16.57	3.98	5	16	1	33355	4.52316	1400.99	3.14643	195.616	2.2914	120	4.41159	0.375739	0.637342	32.075	1465.08	2451.6	9.3825	76.481	15.6561	506.533
4L	d	20	20.2	74.5	200	34.41	15.39	3.66	33	45	4	1774.03	3.24896	1302.05	3.11463	241.402	2.38274	115	4.7153	0.296406	0.560678	30.0174	1377.64	2513.89	14.1749	64.478	13.8909	416.512
4R	d	20	20.2	74.5	200	38.46	16.52	4.05	33	51	4	640.71	2.80666	947.119	2.9764	206.852	2.31566	94	6.01027	0.26691	0.507968	26.7447	1598.71	2433.27	8.4384	47.749	10.7913	288.132
5L	e	19	19.4	75	360	30.83	13.81	2.56	69	85	3	4322.26	3.63571	1640.32	3.21493	201.216	2.30366	76	6.9716	0.21594	0.705566	35.7632	1495.68	2564.2	11.4508	53.623	9.007	323.657
5R	e	19	19.4	75	360	34.45	16.46	3.36	69	77	6	385.71	2.58626	4110.63	3.61391	240.585	2.38127	20	5.47189	0.26474	0.47815	23.15	1325.33	2519.5	-1.445	9.563	11.7557	275.126
6L	f	21	23.6	76.9	250	37.4	16.85	3.74	-3	10	2	59052.7	4.77124	2961.19	3.47147	213.761	2.32993	111	5.34643	0.294359	0.551459	31.2973	1528.69	2553.2	12.2165	61.212	12.228	382.935
6R	f	21	23.6	76.9	250	38.12	17	3.76	-3	7	2	14080.4	4.14861	2025.97	3.30663	234.379	2.36992	62	6.3441	0.240298	0.691968	39.7097	1375.23	2517.07	8.55613	42.902	10.0908	400.249
7L	g	19.4	22	76.1	145	37.2	17.05	4.08	58	68	3	9063.06	3.95727	3172.78	3.50144	261.104	2.41681	121	4.67522	0.347372	0.437967	24.0661	1377.47	2609.59	9.58207	52.994	14.2891	343.304
7R	g	19.4	22	76.1	145	37.4	17.51	3.99	58	71	3	12250.6	4.08816	736.111	2.86694	179.924	2.25509	86	5.11253	0.305683	0.464721	26.4302	1340	2556	8.35198	39.966	12.8242	336.126
8L	h	18.9	20.3	77.1	93	40.5	18.4	4.78	89	93	2	525.734	2.72077	424.348	2.62772	172.977	2.23799	0								0	0	0
8R	h	18.9	20.3	77.1	93	36.64	15.49	2.92	89	97	2	113.599	2.05537	714.836	2.85421	184.501	2.266	30	6.60119	0.242187	0.513967	28.6667	1375.85	2595.47	10.7253	15.419	9.59273	277.404
9L	i	23	24.7	75.6	305	37.82	16.58	3.31	37	52	4	6699.39	3.82604	892.764	2.95074	211.628	2.32557	131	3.78208	0.253557	0.387076	25.1221	1378.82	2593.74	7.69534	50.707	16.8624	424.445
9R	i	23	24.7	75.6	305	33.5	15	2.84	37	48	2	6654.65	3.82312	671.757	2.82721	214.997	2.33243	84	5.60274	0.267351	0.56981	36.7738	1586.54	2792.09	9.5475	47.864	11.4505	423.518
10L	j	23	24.2	73.5	708	39.99	17.1	4.03	76	90	1	1510.43	3.1791	2954.31	3.47046	156.022	2.19319	126	4.78031	0.250307	0.362992	23.4444	1574.23	2645.09	12.1483	45.737	13.2884	311.381
10R	j	23	24.2	73.5	708	37.4	15.1	2.85	76	87	2	1527.93	3.1841	873.567	2.9413	173.922	2.24035	177	3.43051	0.245165	0.315475	20.1469	1295.4	2565.66	7.72571	55.839	18.5065	373.254
11L	k	18	21.7	70.6	295	36.5	15.58	3.14	6	20	1	5016.24	3.70038	837.971	2.92323	207.092	2.31616	68	6.54434	0.215529	0.638765	33.6324	1326.15	2503.69	11.0984	43.436	9.61712	324.596
11R	k	18	21.7	70.6	295	37.08	15.4	2.89	6	23	3	268.724	2.42931	974.547	2.9888	122.578	2.08841	108	5.13028	0.292022	0.235157	9.48148	1291.2	2538.81	5.81843	25.397	12.6644	119.813
12L	l	18	21.5	71.2	510	36.9	17.35	3.92	38	57	2	8435.21	3.9261	785.572	2.89519	214.746	2.33193	114	4.46279	0.270501	0.583737	31.1316	1304.64	2470.28	10.9601	66.546	14.3556	446.324
12R	l	18	21.5	71.2	510	34.2	14.4	2.71	38	50	5	1459.07	3.16408	497.062	2.69641	162.333	2.21041	101	6.05597	0.235898	0.459079	23.6535	1431.93	2666.17	11.0434	46.367	10.4524	247.392
13L	m	17	20.1	70.3	353	37.74	15.67	3.67	74	92	8	27523.2	4.4397					110	4.98625	0.264881	0.608782	32.6273	1274.21	2361.38	10.0095	66.966	12.8504	418.818
13R	m	17	20.1	70.3	353	35.4	14.48	2.85	74	84	6	194.25	2.28836	717.251	2.85567	232.64	2.36668	9	7.267		0.721556	36.1111	1301.56	2483.67	9.02333	6.494	8.2565	297.234
14L	n	18	19.6	72.2	700	37.17	15.75	3.67	10	20	7	16124	4.20747					94	5.06659	0.238789	0.547085	25.6596	1294.52	2446.31	12.0712	51.426	12.475	321.213
14R	n	18	19.6	72.2	700	36.7	16	3.59	10	27	5	1915.97	3.28239	754.729	2.87779	164.612	2.21646	92	5.96504	0.246274	0.560587	26.0543	1456.29	2664.86	12.8468	51.574	10.6505	277.738

## Sheet: metadata
subj_id: ID of each frog, L is the male recorded on the left channel, R on the right channel.
date: date recording was taken
trial: alphabetic code for the trial
air_temp: air temperature (ºC) measured from a weather app, likely inaccurate
water_temp: an estimate of the water temperature (ºC) taking with an infrared thermometer, a single measurement was taken equidistant between the two frogs
spl: sound pressure level (dB) collected at the edge of the pond with a field sound pressure meter
dist_bw: distance between the two recorded males (cm)
svl: snout-vent-length (mm)
tfl: tibia-fibula length (mm)
weight: body mass of the frog (g)
rec_start: time of night the recording began in minutes after 10 pm
time_bleed: time of night the frogs was bled in minutes after 10 pm
bleed_time: time (min) it took to collect a blood sample from the frog, rounded to the nearest minute
test: level of circulating testosterone (pg/mL)
cort: level of circulating corticosterone (pg/mL)
est: level of circulating estradiol (pg/mL)
numcalls: total number of calls over the 10 min recording
period: time from the start of one call to the start of the next (s)
period_cv: coefficient of variation of the call periods as a measure of call rate consistency
duration: time the last pulse of the call ended minus the time first pulse of the call started (s)
pulsen: average number of pulses in the call
fundfreq: average fundamental frequency (Hz) of the call
domfreq: average dominant frequency (Hz) of the call
rel_amp: average amplitude (dB) of the dominant frequency minus the amplitude (dB) of the fundamental frequency
total_calling: total time spent calling, calculated as the number of calls times the average call duration
call_rate: average call rate of the recording (calls/min)
pulses_min: average call effort of the recording (pulses/min)
